# Supplementary material for: Glow discharge optical emission spectrometry elemental mapping with restrictive anode array masks
Source: Royal Society of Chemistry journal article supplement (doi:10.1039/c5ja00288e), 2015-08-13
Supplement: c5ja00288e1.pdf [file c5ja00288e1.pdf]

**Supplementary Information for: Glow Discharge Optical Emission  
Spectroscopy Elemental Mapping with Restrictive Anode Array Masks.**

*Marcel Kroschk, John Usala, Trevor Adesso, Gerardo Gamez\**

*Texas Tech University, Department of Chemistry and Biochemistry, Box 41061, Lubbock, TX  
7940-1061, USA. [Gerardo.Gamez@ttu.edu](mailto:Gerardo.Gamez@ttu.edu)*

*\*Corresponding Author*

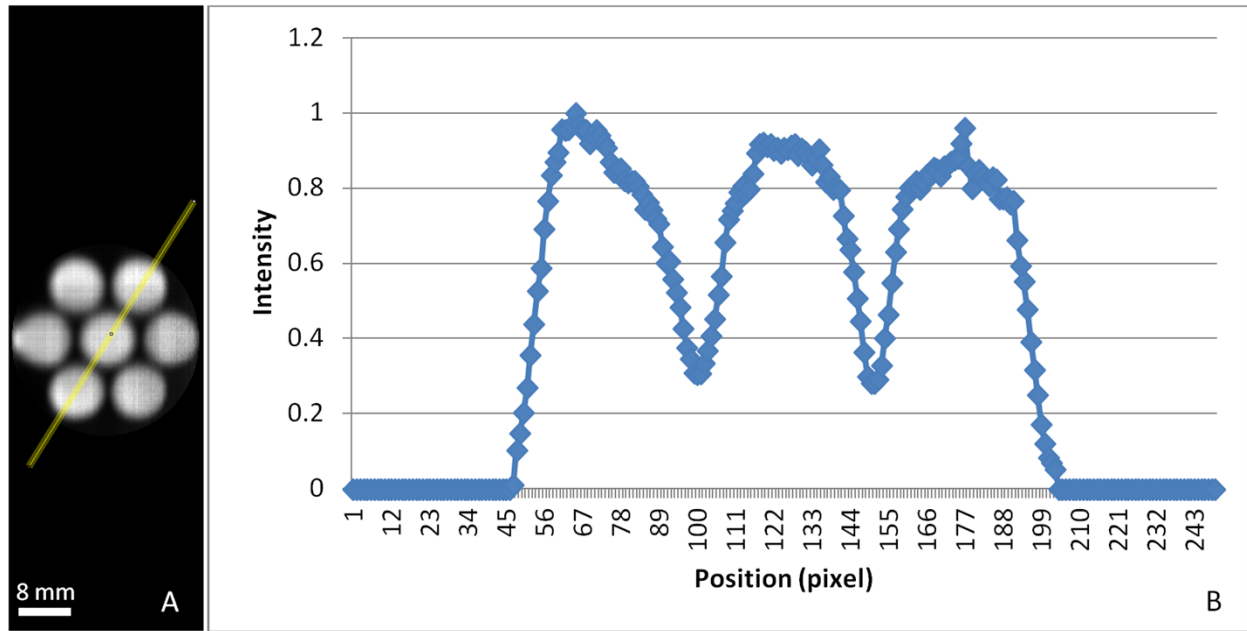

**Figure S11: A) GDOES emission at 324.7 nm of a brass sample analyzed with a 7 aperture RAAM at 1330 Pa, 2 watt/mm<sup>2</sup>, 8 mm i.d., 3 mm thickness. B) Normalized intensity profile along the line in figure S1A.**

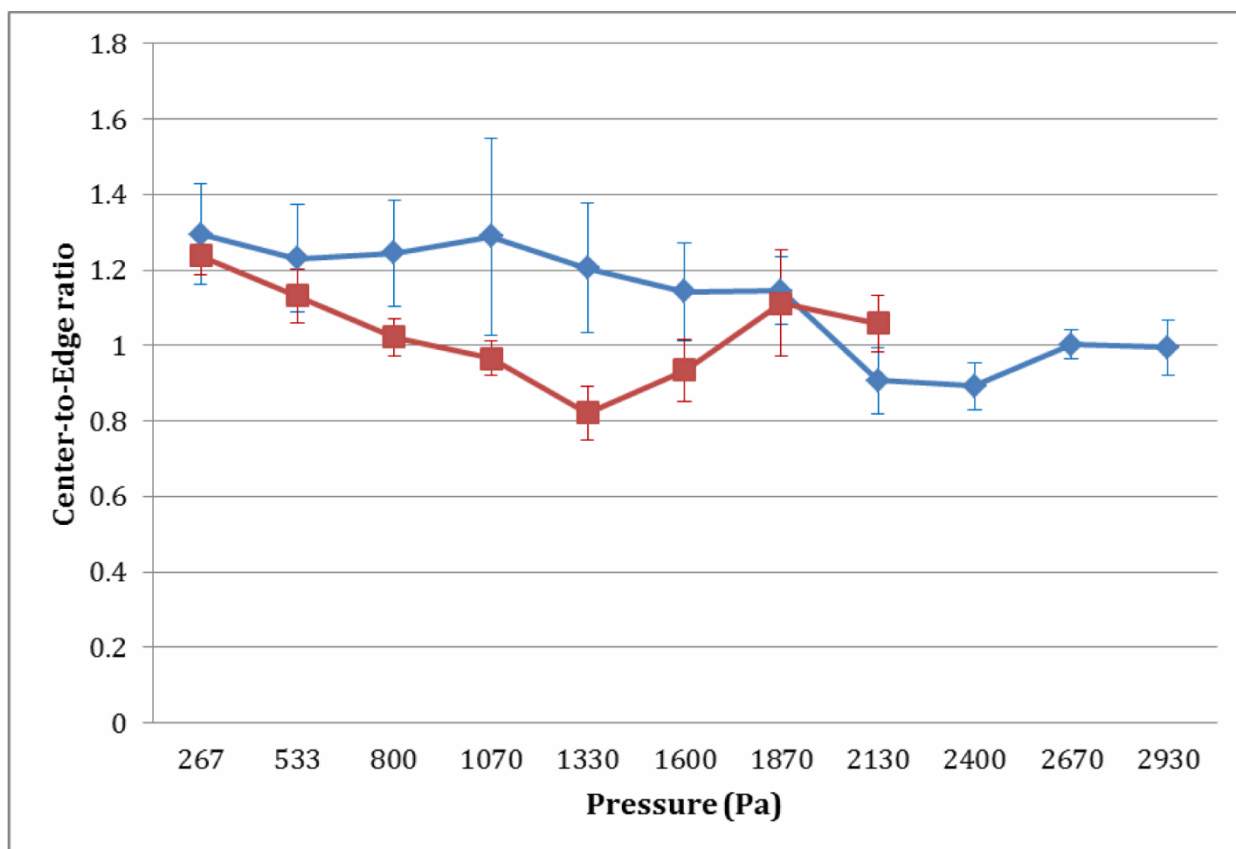

Figure S12: Plot of center-to-edge intensity ratio as a function of pressure of RAAMs with 8 mm i.d. apertures, 2 watts/mm<sup>2</sup>, with 3 mm thickness (red squares) or 12 mm thickness (blue diamonds).

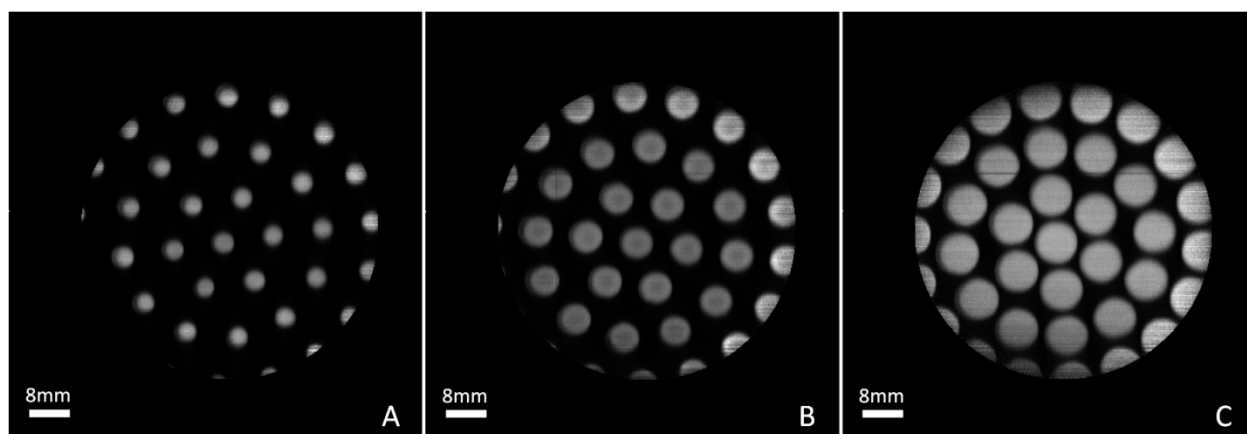

**Figure SI3: GDOES emission at 324.7 nm of a brass sample analyzed with a 37 aperture RAAM at 1330 Pa, 2 watts/mm<sup>2</sup>, and 12 mm thick, and either A) 4 mm i.d., B) 6 mm i.d., or C) 8 mm ID apertures.**
